# Supplementary material for: Gene expression signatures of neuroendocrine prostate cancer and primary small cell prostatic carcinoma
Source: Springer Nature journal article supplement (doi:10.1186/s12885-017-3729-z), 2017-11-13
Supplement: MOESM3 [file 15220248]

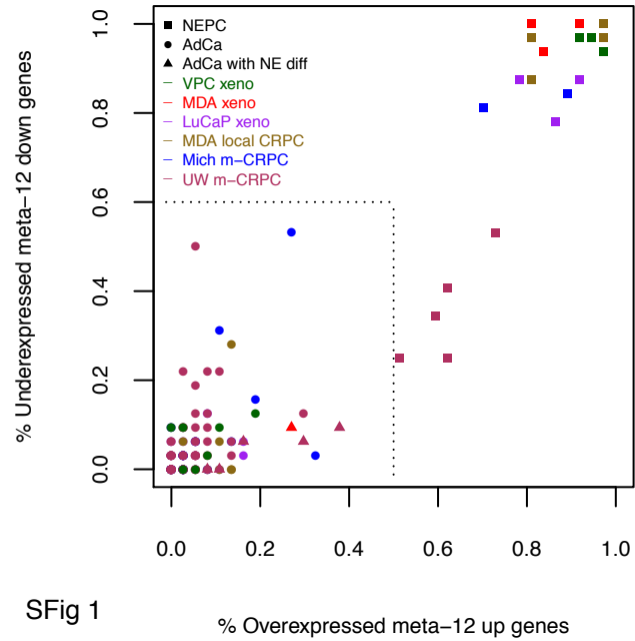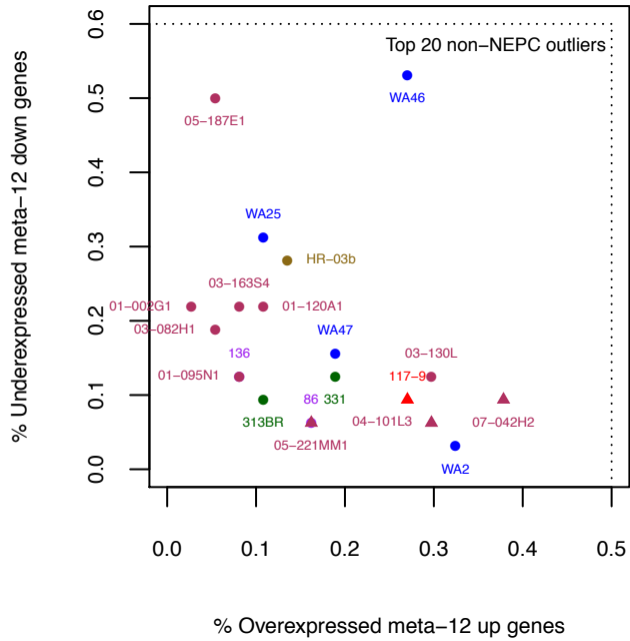

SFig 1

% Overexpressed meta-12 up genes

% Overexpressed meta-12 up genes

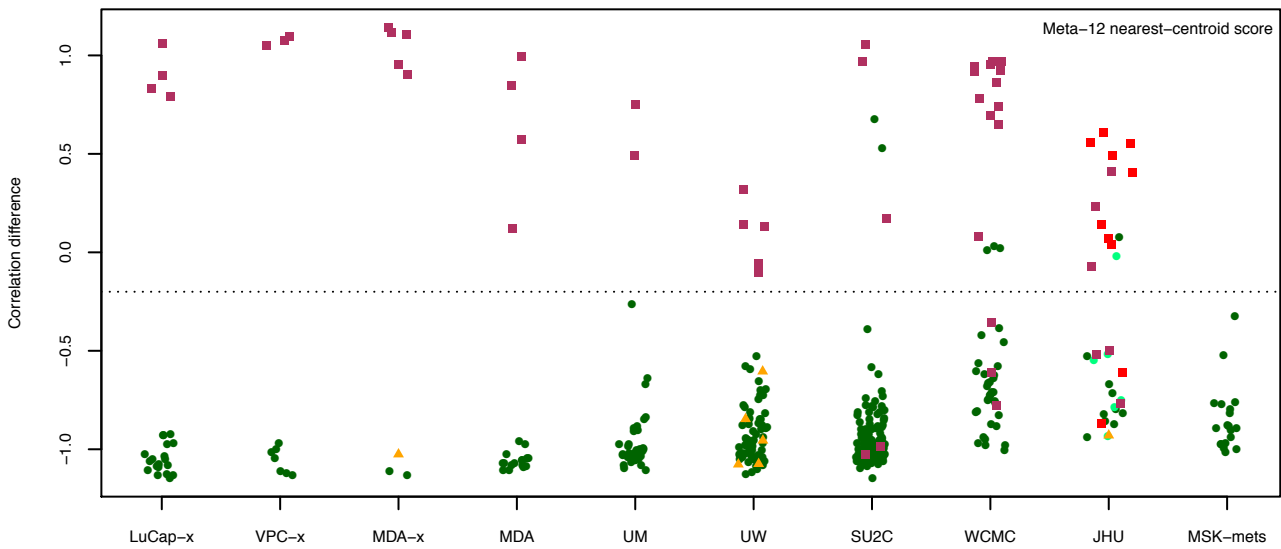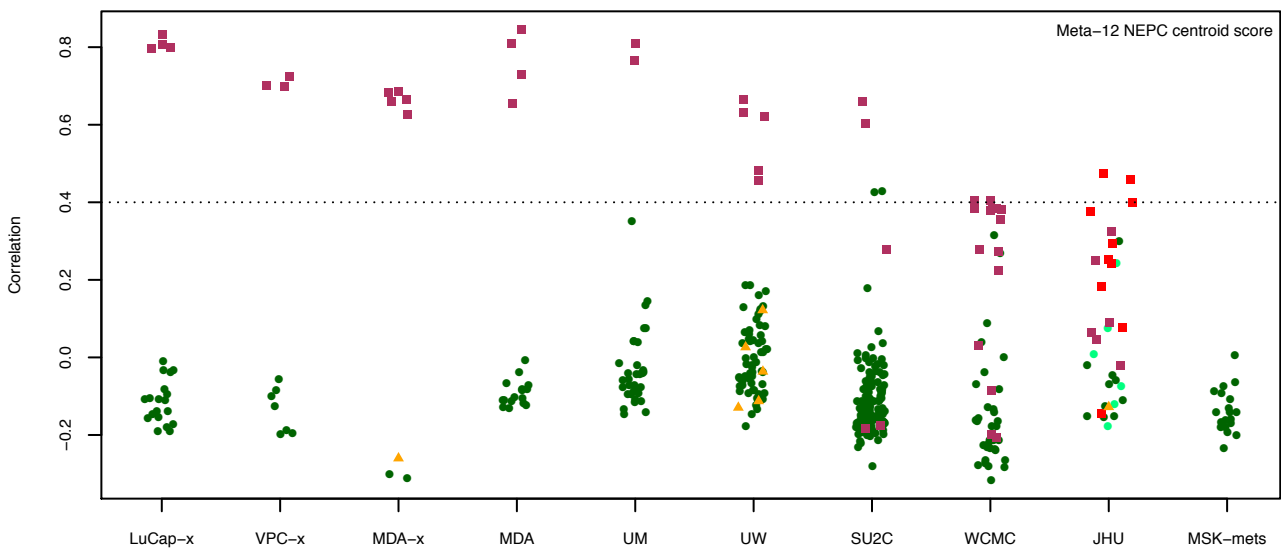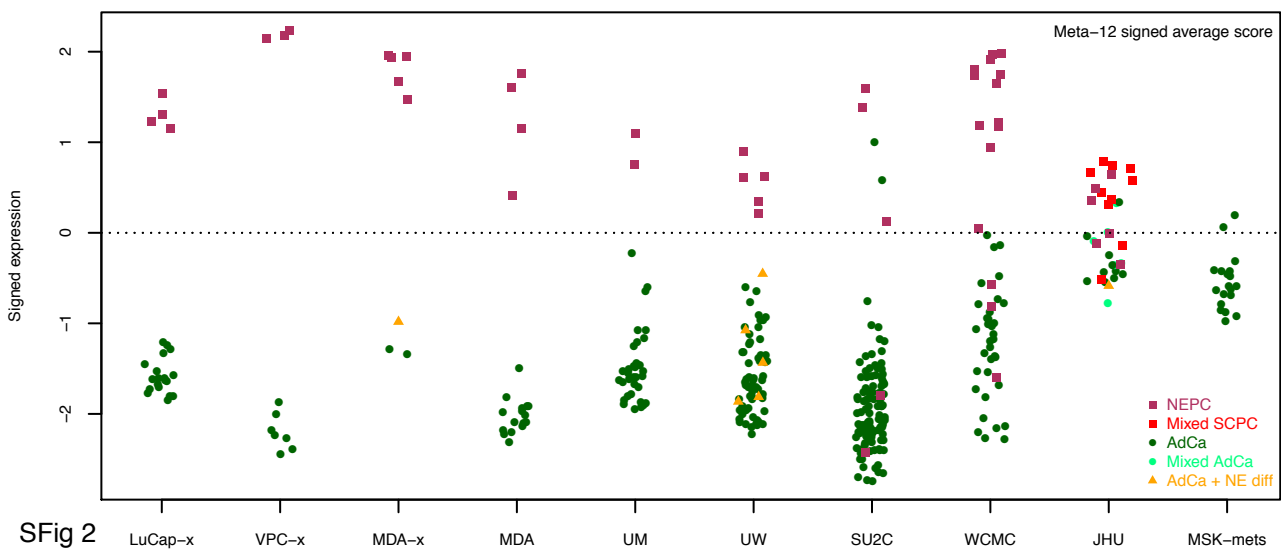

Sfig 2

AR signaling

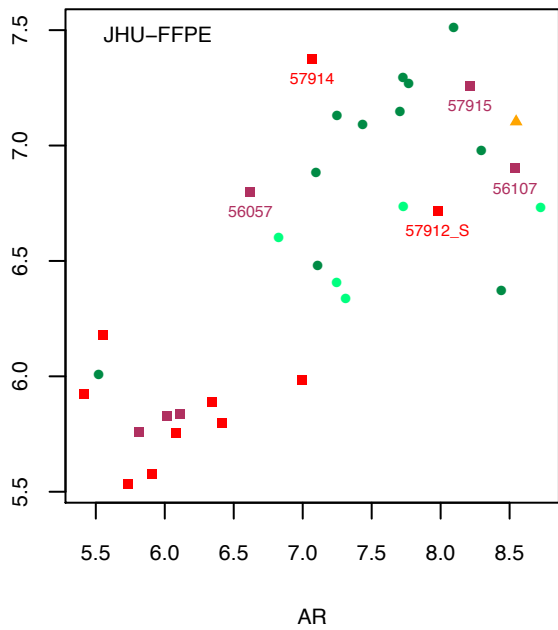

AR signaling

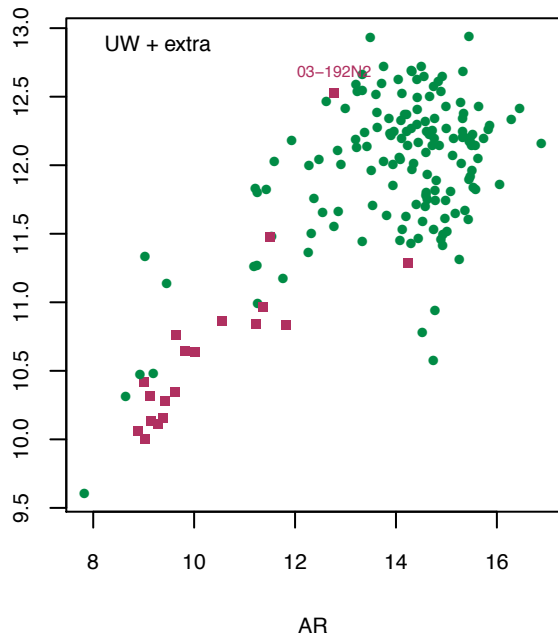

AR signaling

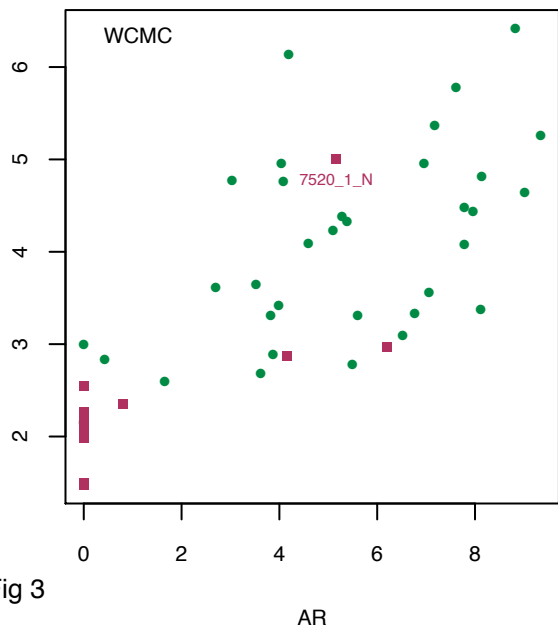

AR signaling

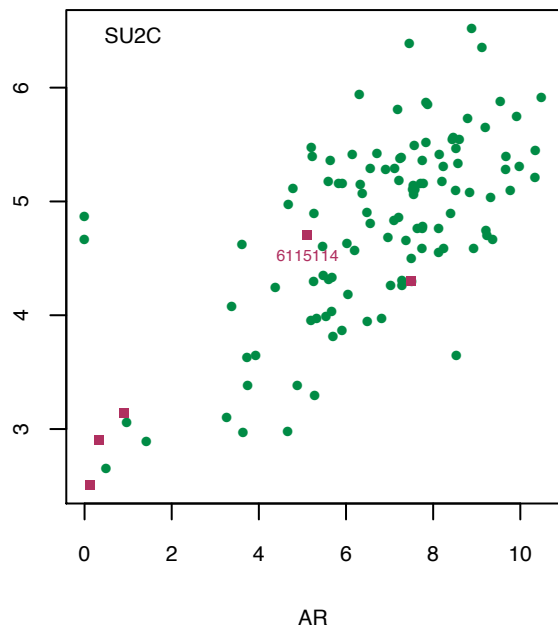

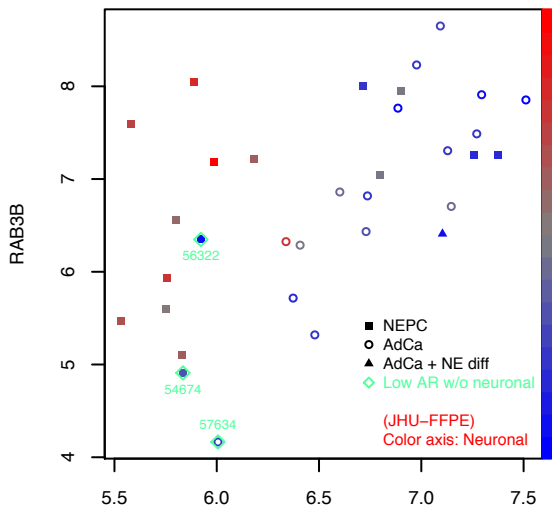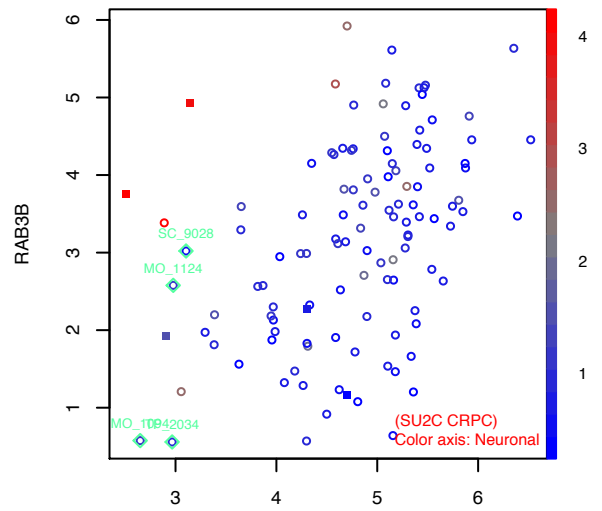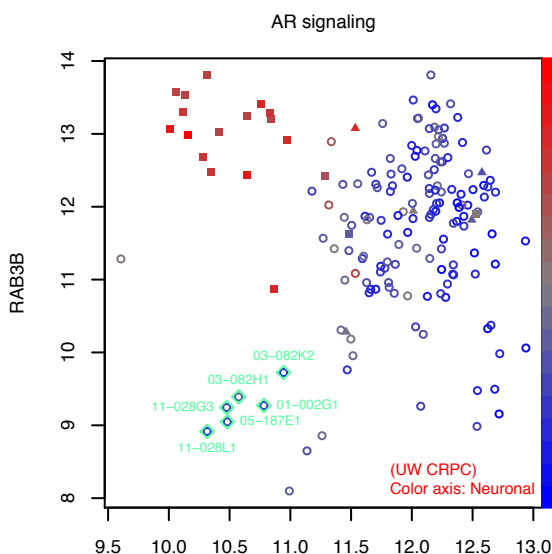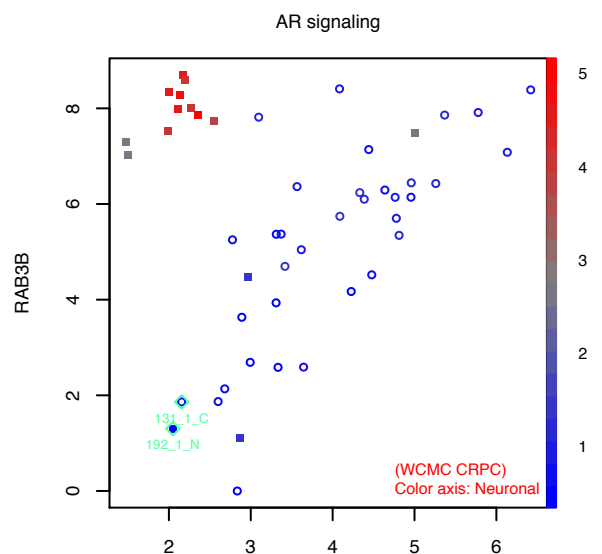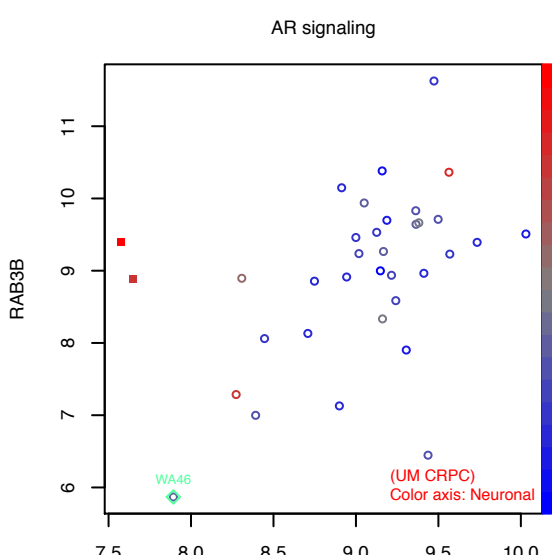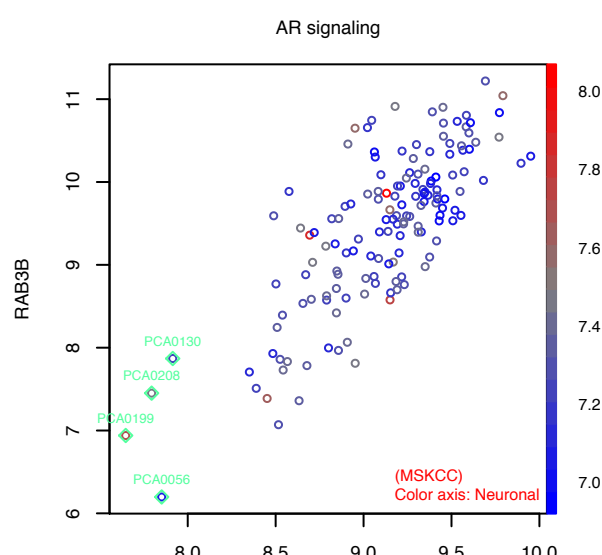

SFig 4



CCP

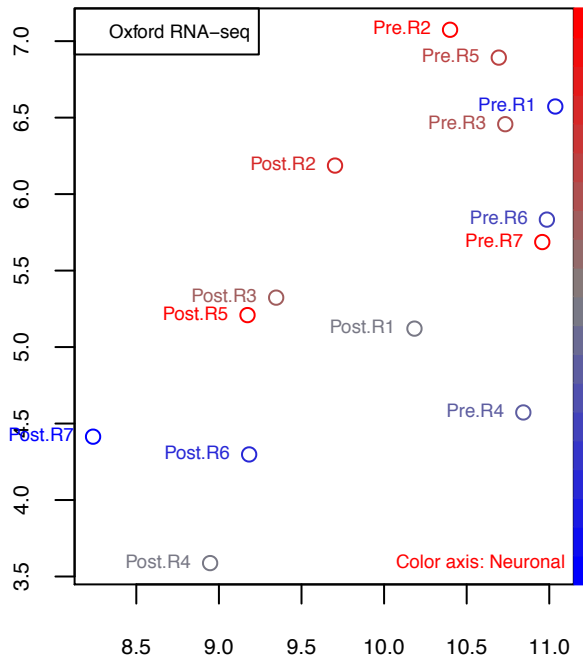

5.0

4.8

4.6

4.4

4.2

RAB3B

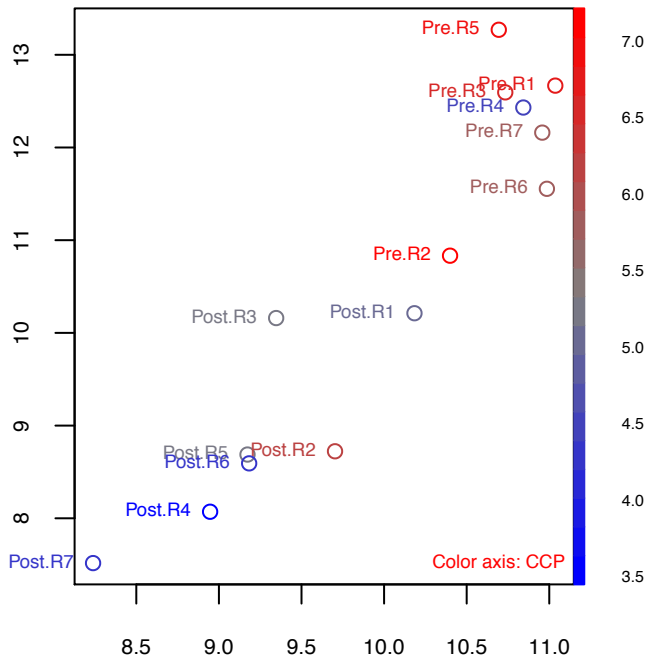

7.0

6.5

6.0

5.5

5.0

4.5

4.0

3.5

SFig 5

AR signaling

AR signaling

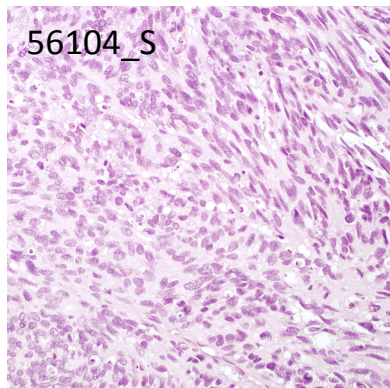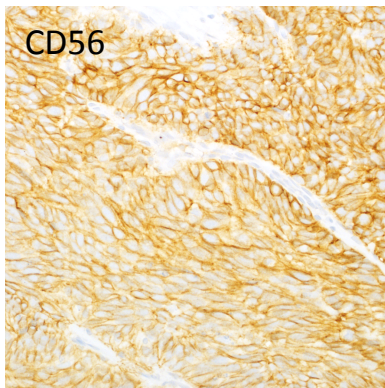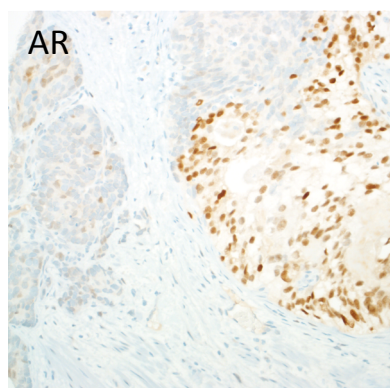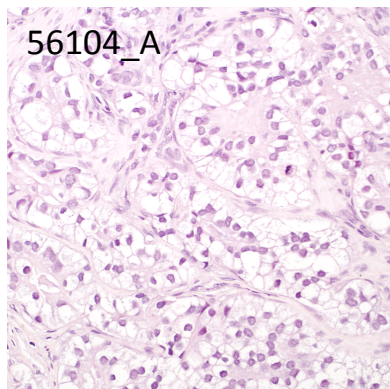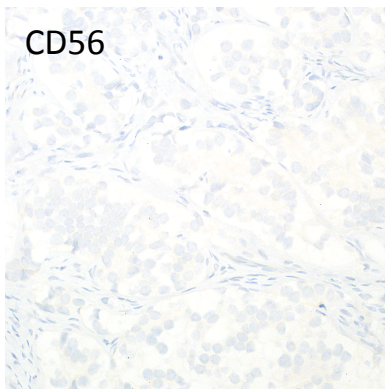

SFig 6

REST

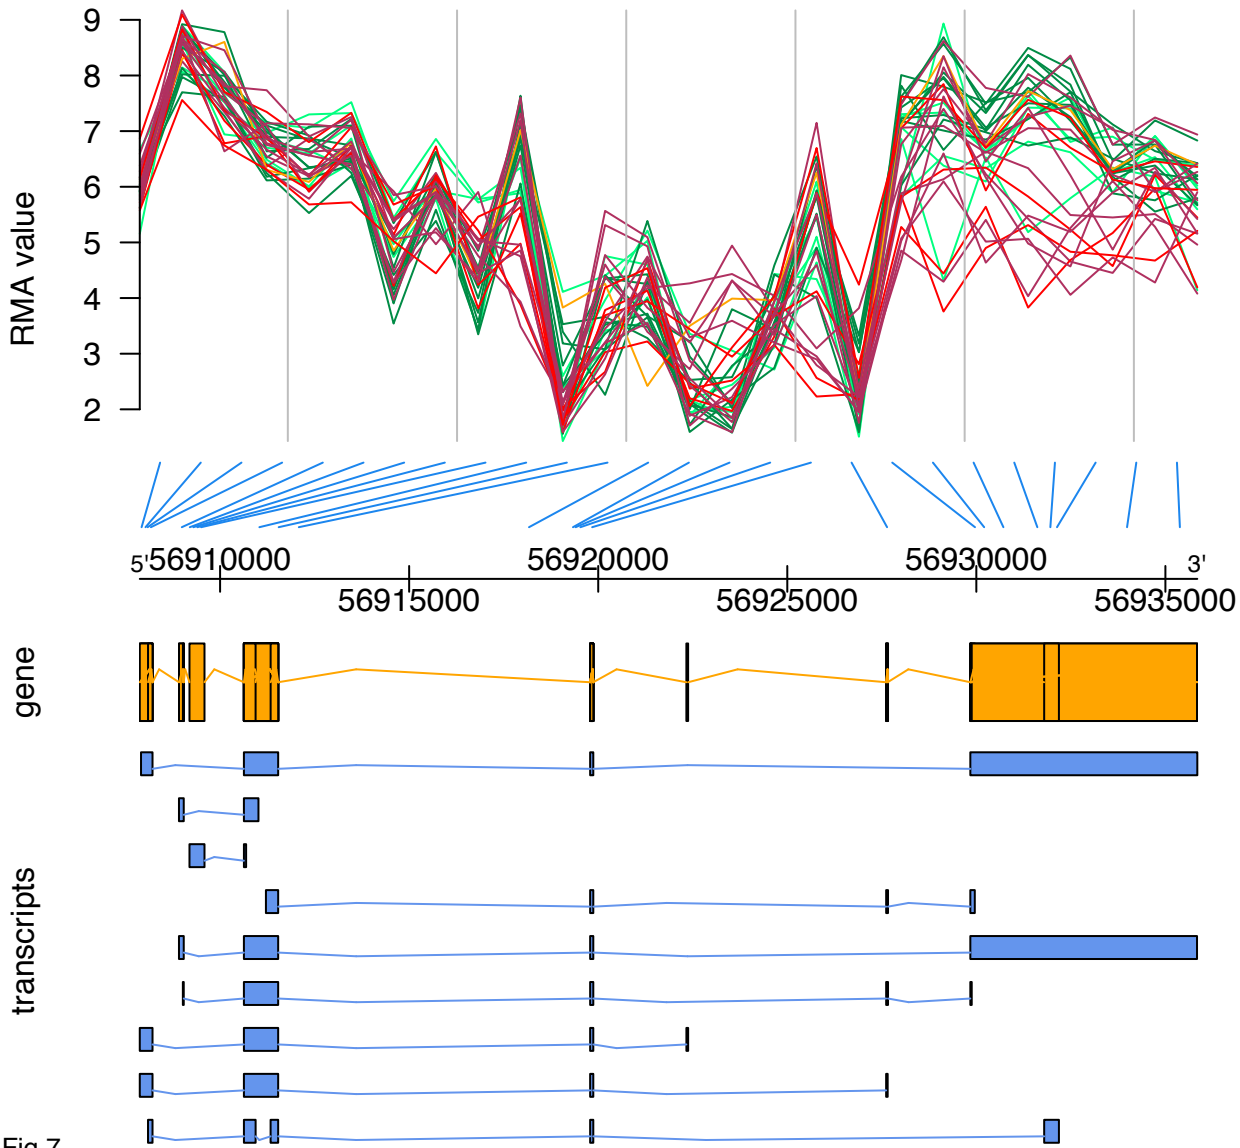

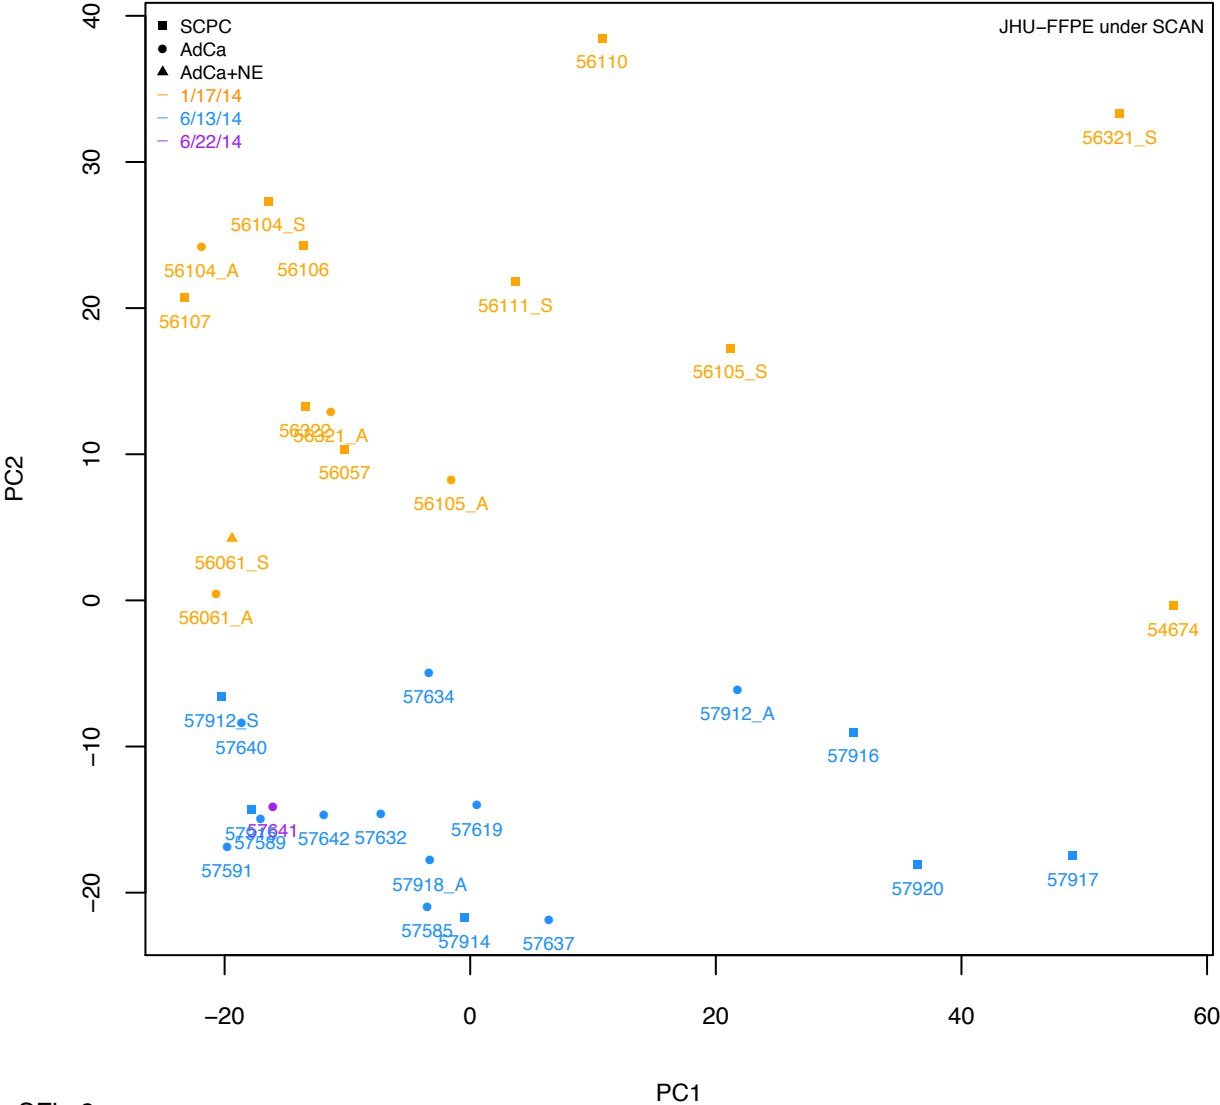

SFig 8

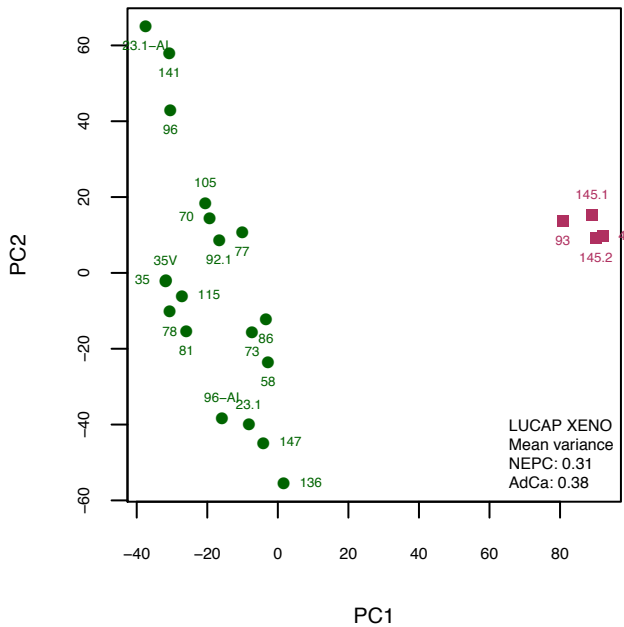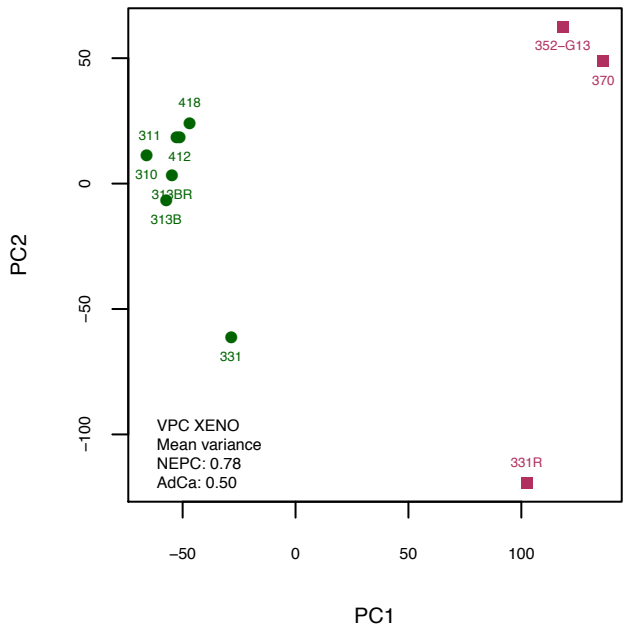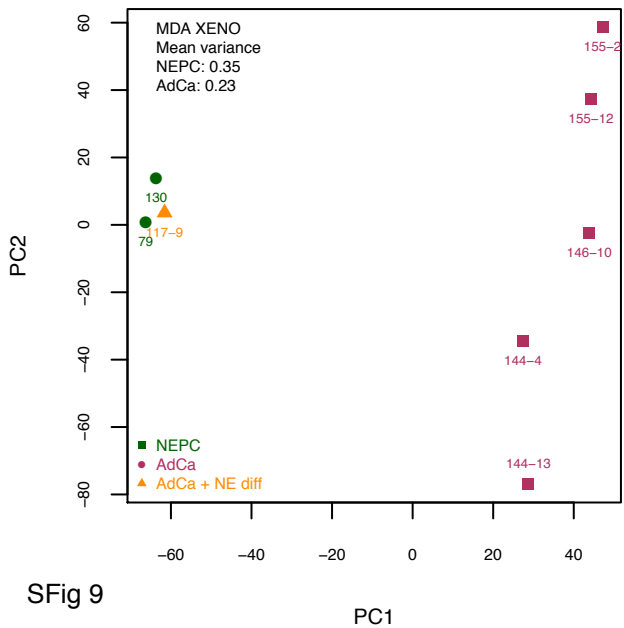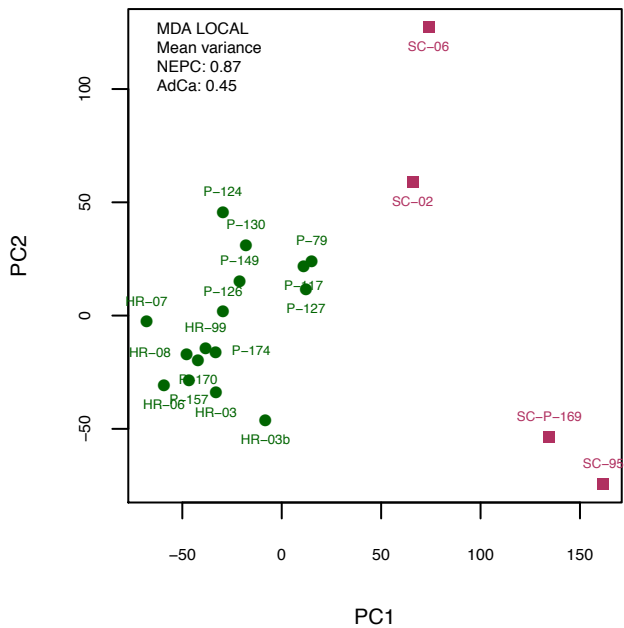

Sfig 9

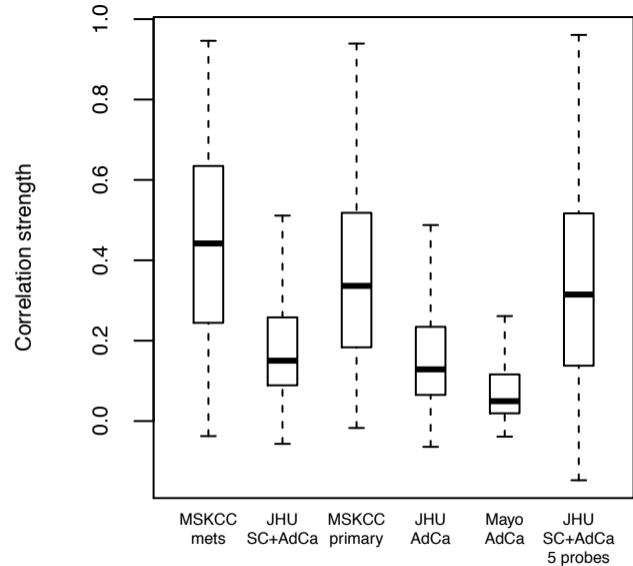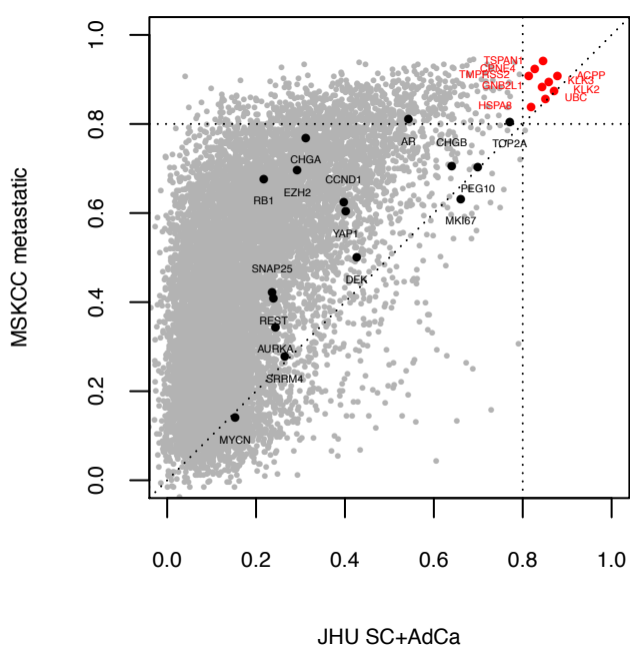

SFig 10

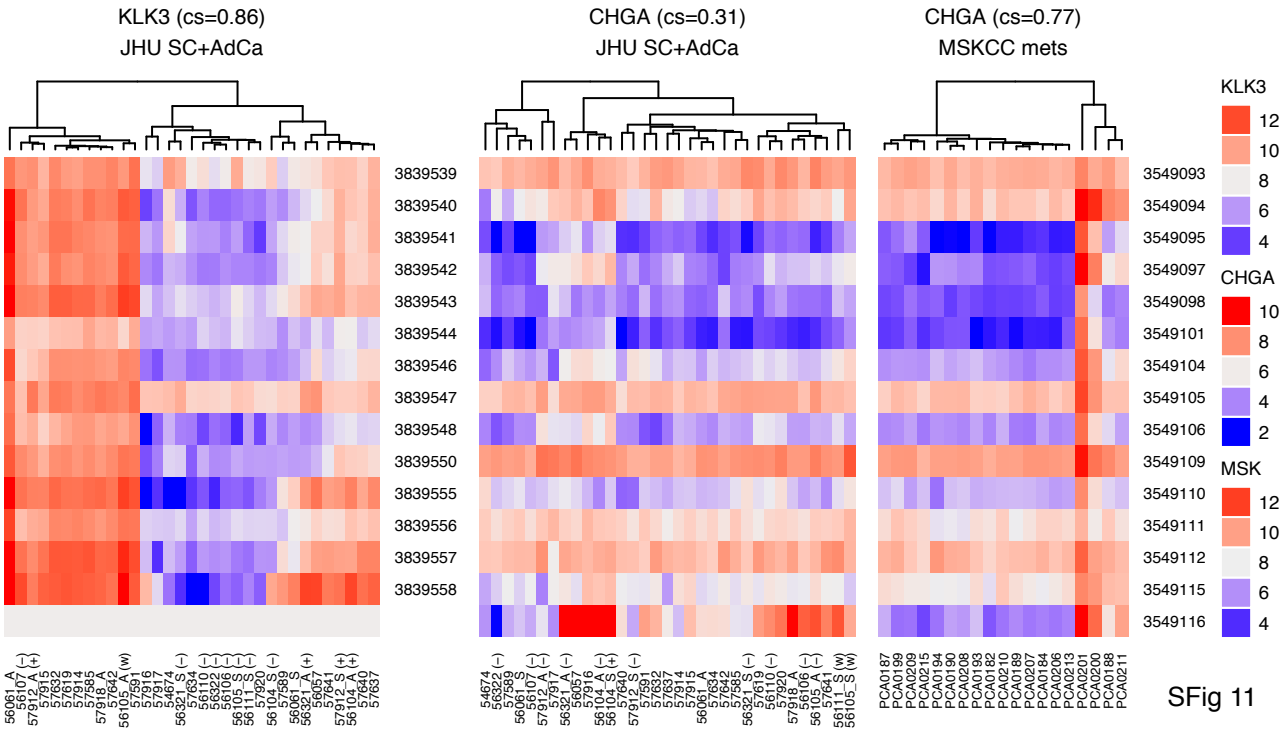

SFig 11
